# Supplementary material
Source: HighWire-hosted journal article supplement (https://www.cmaj.ca/highwire/filestream/57897/field_highwire_adjunct_files/0/insulin-gri-1-at.pdf)
Supplement: insulin-gri-1-at.pdf [file insulin-gri-1-at.pdf]

**Appendix 1:** Search strategy used for MEDLINE, EMBASE and CENTRAL to identify randomized trials included in this meta-analysis.

## **MEDLINE**

1. Intensive Care Unit/
2. Critical Illness/
3. Coronary Care Unit/
4. Postoperative Care/
5. Intensive Care/
6. (intensive care or ICU or critical care or coronary care or recovery room or par or critical illness or burn unit or critically ill or cardiac care).mp. [mp=title, original title, abstract, name of substance word, subject heading word]
7. 1 or 2 or 3 or 4 or 5 or 6
8. Insulin/
9. Antidiabetic Agent/
10. (intensive insulin or glycemic control or blood glucose or insulin).mp. [mp=title, original title, abstract, name of substance word, subject heading word]
11. (trial\* or random\* or placebo).mp. [mp=title, original title, abstract, name of substance word, subject heading word]
12. Blood Glucose/
13. 8 or 10 or 9 or 12
14. Placebos/
15. Clinical Trial/
16. 11 or 15 or 14
17. 7 and 16 and 13

## **EMBASE**

1. Intensive Care Unit/
2. Critical Illness/
3. Coronary Care Unit/
4. Postoperative Care/
5. Intensive Care/
6. (intensive care or ICU or critical care or coronary care or recovery room or par or critical illness or burn unit or critically ill or cardiac care).mp. [mp=title, abstract, subject headings, heading word, drug trade name, original title, device manufacturer, drug manufacturer name]
7. 1 or 2 or 3 or 4 or 5 or 6
8. Insulin/
9. Glucose Blood Level/
10. Antidiabetic Agent/
11. (intensive insulin or glycemic control or blood glucose or insulin).mp. [mp=title, abstract, subject headings, heading word, drug trade name, original title, device manufacturer, drug manufacturer name]
12. 8 or 11 or 10 or 9

Appendix to: Griesdale DEG, de Souza RJ, van Dam RM, et al. Intensive insulin therapy and mortality among critically ill patients: a meta-analysis including NICE-SUGAR study data.

*CMAJ* 2009;180. DOI: 10.1503/cmaj.090206.

Copyright © 2009, Canadian Medical Association.

13. Clinical Trial/
14. Placebo/
15. (trial\* or random\* or placebo).mp. [mp=title, abstract, subject headings, heading word, drug trade name, original title, device manufacturer, drug manufacturer name]
16. 13 or 15 or 14
17. 7 and 16 and 12

## **CENTRAL**

1. Intensive Care Units/
2. Coronary Care Units/
3. Postoperative Care/
4. Intensive Care/
5. (intensive care or ICU or critical care or coronary care or recovery room or par or critical illness or burn unit or critically ill or cardiac care).mp. [mp=title, original title, abstract, mesh headings, heading words, keyword]
6. 1 or 2 or 3 or 4 or 5
7. Insulin/
8. Blood Glucose/
9. Hypoglycemic Agents/
10. (intensive insulin or glycemic control or blood glucose or insulin).mp. [mp=title, original title, abstract, mesh headings, heading words, keyword]
11. 8 or 7 or 10 or 9
12. 6 and 11
